# Supplementary material for: Facile hydrothermal synthesis of SnO2/C microspheres and double layered core–shell SnO2 microspheres as anode materials for Li-ion secondary batteries
Source: Royal Society of Chemistry journal article supplement (doi:10.1039/c4ra00477a), 2014-01-01
Supplement: c4ra00477a1.pdf [file c4ra00477a1.pdf]

Supporting Information for

## Facile hydrothermal synthesis of SnO<sub>2</sub>/C microspheres and double layered core-shell SnO<sub>2</sub> microspheres as anode materials for Li-ion secondary batteries

Mingbo Wu,<sup>\*a</sup> Jun Liu,<sup>a</sup> Minghui Tan,<sup>a</sup> Zhongtao Li,<sup>a</sup> Wenting Wu,<sup>a</sup> Yanpeng Li,<sup>a</sup> Huaiping Wang,<sup>a</sup> Jingtang Zheng,<sup>a</sup> and Jieshan Qiu,<sup>\*b</sup>

<sup>a</sup> State Key Laboratory of Heavy Oil Processing, China University of Petroleum, Qingdao 266580, China. E-mail: wumb@upc.edu.cn.

<sup>b</sup> Carbon Research Laboratory, State Key Lab of Fine Chemicals, School of Chemical Engineering, Dalian University of Technology, Dalian 116024, China. E-mail: jqiu@dlut.edu.cn.

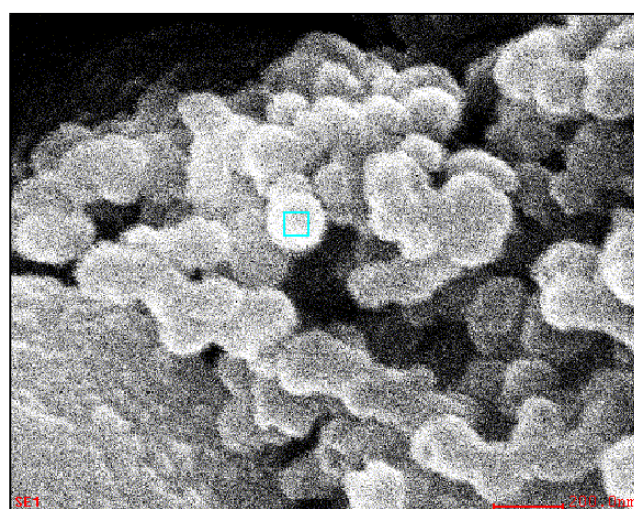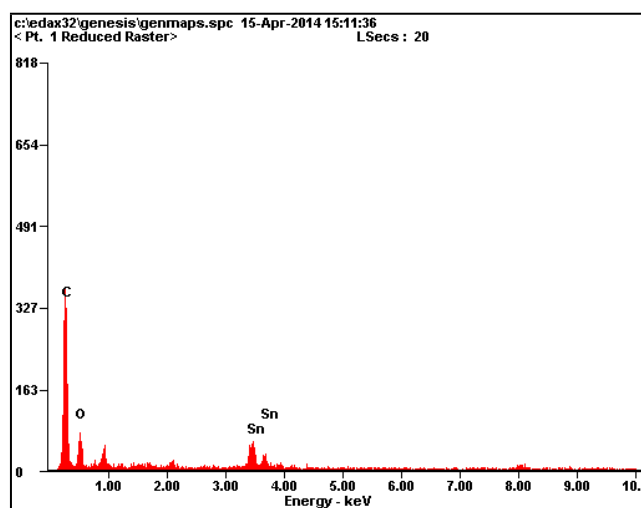

Fig. S1 EDS result of the smaller particles in Fig. 3(A)

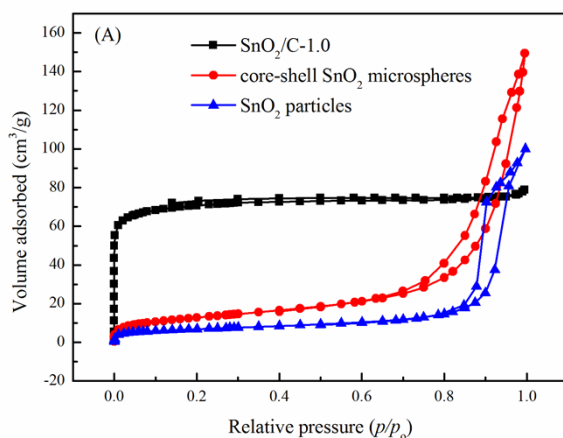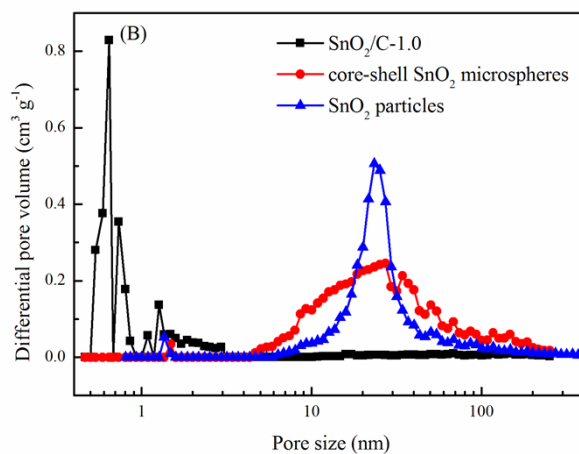

Fig. S2 N<sub>2</sub> adsorption-desorption isotherms (A) and pore size distribution (B) of SnO<sub>2</sub>/C-1.0 microspheres, double layered core-shell SnO<sub>2</sub> microspheres and SnO<sub>2</sub> particles

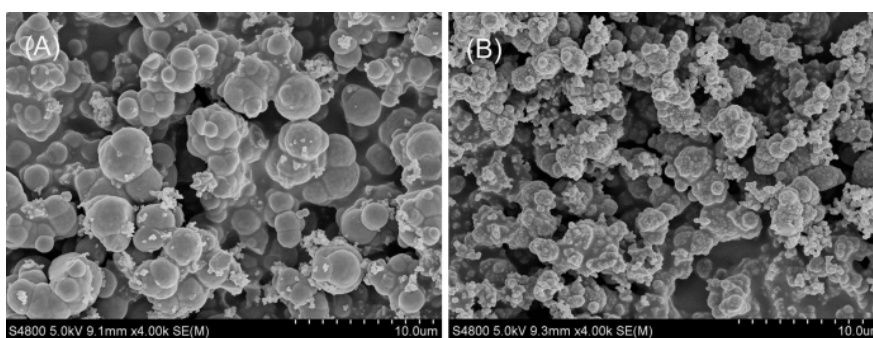

Fig. S3 SEM images of SnO<sub>2</sub>/C-1.5 (A) and SnO<sub>2</sub>/C-0.5 (B)

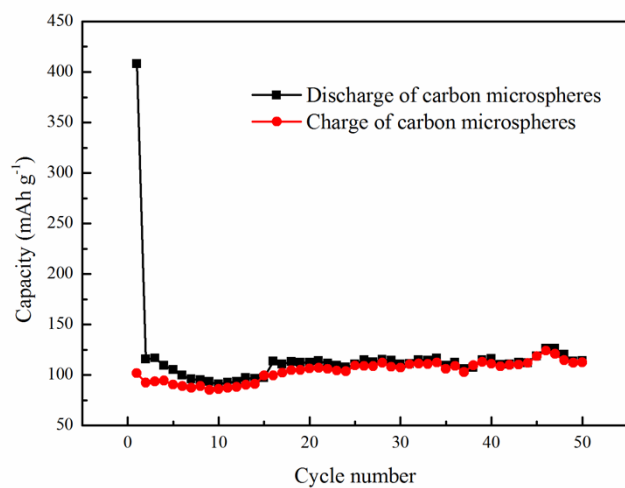

Fig. S4 Cycling performance of purely carbon microspheres

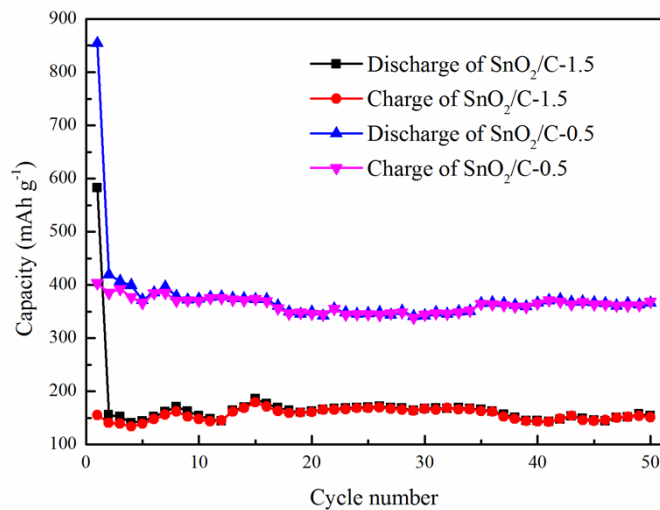

Fig. S5 Cycling performances of SnO<sub>2</sub>/C-1.5 and SnO<sub>2</sub>/C-0.5
